# Supplementary material for: mTOR signaling regulates the morphology and migration of outer radial glia in developing human cortex
Source: eLife. 2020 Sep 2;9:e58737. doi: 10.7554/eLife.58737 (PMC7467727; doi:10.7554/eLife.58737)
Supplement: Figure 1—source data 1. [file elife-58737-fig1-data1.xlsx]

## Sheet: Figure1-Source Data 1H
	File name	Sox2+ pS6+ VZ	%	Sox2+ pS6+ oSVZ	%	Tbr2+ pS6+ VZ	%	Tbr2+ pS6+ oSVZ	%	CRAYB+ pS6+ VZ	%	IBA1+ pS6+ VZ	%	IBA1+ pS6+ oSVZ	%	Laminin+ pS6+ VZ	%	Laminin+ pS6+ oSVZ	%	Total pS6+ Cells
	sox2 ps6 tbr2 neun_GW17 section1 oSVZ			77	0.469512			4	0.0243902											164
	sox2 ps6 tbr2 neun_GW17 section1 area2 oSVZ			64	0.365714			7	0.04											175
	10-19 sox2 ps6 tbr2 neun_GW17 section1 area1 VZ	6	0.0458015			4	0.0305344													131
	10-19 sox2 ps6 laminin tbr2 GW17 section1 area1 VZ	4	0.0285714			3	0.0214286									41	0.292857			140
	10-19 sox2 ps6 laminin tbr2 GW17 section1 area1 oSVZ			37	0.256944	-		3	0.0208333									43	0.298611	144
	10-19 sox2 ps6 laminin tbr2 GW17 section1 area2 VZ	11	0.0436508			4	0.015873									44	0.174603			252
	10-19 sox2 ps6 laminin tbr2 GW17 section1 area2 oSVZ			74	0.387435	-		3	0.0157068									96	0.502618	191
	10-19 sox2 ps6 laminin tbr2 GW17 section2 area2 VZ	8	0.0316206			3	0.0118577									90	0.355731			253
	10-19 sox2 ps6 laminin tbr2 GW17 section2 area2 oSVZ			69	0.316514	2	0.00917431											81	0.37156	218
	cryab ps6 laminin tbr2 GW17 tilescan 001 (vz only)					6	0.0275229			2	0.00917431					153	0.701835			218
	cryab ps6 laminin tbr2 GW17 tilescan 002 (vz only)									0	0						0			184
																	#DIV/0!
	fam107 ps6-546 laminin-594 tbr2-647 tilescan (vz only)							5	0.0299401							154	0.922156			167
																	#DIV/0!
	Gw19 sox2 ps6 tbr2 neun section1 area1 VZ	4	0.047619			1	0.0119048													84
	Gw19 sox2 ps6 tbr2 neun section1 area1 oSVZ			9	0.1875			0	0											48
	Gw19 sox2 ps6 tbr2 neun section1 area1 tile (VZ only)	4	0.0151515			3	0.0113636													264
																	#DIV/0!
	10-19 Gw19 sox2 ps6 laminin tbr2 section1 area1 VZ	0	0			0	0									116	0.604167			192
	10-19 Gw19 sox2 ps6 laminin tbr2 section1 area2 VZ	1	0.00763359			2	0.0152672													131
	10-19 Gw19 sox2 ps6 laminin tbr2 section1 area2 oSVZ			14	0.141414			0	0											99
																	#DIV/0!
	GW19 Dapi_CryaB488_pS6546_Tbr2594_laminin647 VZ					2	0.0116279			2	0.0116279					127	0.738372			172
	GW19 Dapi_CryaB488_pS6546_Tbr2594_laminin647 oSVZ							1	0.012987	0	0							67	0.87013	77
	Gw15 sox2 ps6 laminin tbr2 section1 area1 VZ	0	0			0	0									87	0.790909			110
																	#DIV/0!
	GW17_staining controls_DAPI_Iba1_pS6_Sox2_laminin_Feb2020 VZ area1	8	0.0277778									73	0.253472			78	0.270833			288
	GW17_staining controls_DAPI_Iba1_pS6_Sox2_laminin_Feb2020 VZ area2											87	0.319853			82	0.301471			272
	GW17_staining controls_DAPI_Iba1_pS6_Sox2_laminin_Feb2020 VZ area3	16	0.0561404									30	0.105263			86	0.301754			285
	GW17_staining controls_DAPI_Iba1_pS6_Sox2_laminin_Feb2020 VZ area4	18	0.0339623									159	0.3			127	0.239623			530
	GW17_staining controls_DAPI_Iba1_pS6_Sox2_laminin_Feb2020 oSVZ area1			51	0.310976									6	0.0365854			74	0.45122	164
	GW17_staining controls_DAPI_Iba1_pS6_Sox2_laminin_Feb2020 oSVZ area2			99	0.235714									9	0.0214286			58	0.138095	420
	GW17_staining controls_DAPI_Iba1_pS6_Sox2_laminin_Feb2020 oSVZ area3			82	0.225895									6	0.0165289			97	0.267218	363
