# Supplementary material for: mTOR signaling regulates the morphology and migration of outer radial glia in developing human cortex
Source: eLife. 2020 Sep 2;9:e58737. doi: 10.7554/eLife.58737 (PMC7467727; doi:10.7554/eLife.58737)
Supplement: Figure 2—figure supplement 1—source data 1. [file elife-58737-fig2-figsupp1-data1.xlsx]

## Sheet: figure 2- s1 - source data1A
% cells/dapi	control	Rapa	BDNF	3BDO
	6.38253	0.549138	18.2456	10.9681
	5.77814	0.953854	14.3853	7.89474
	3.03974	0.296308	6.30938	20.2812
	14.039	0.148468	31.6548	14.577
	11.0106	0.511364	41.3177
	5.09011	0.295172	23.2538
	3.47095	2.29592	10.2644
	7.23684		25.4052
			25.4052

## Sheet: figure 2- s1 - source data1C
	pS6					Gfp fiber length
	Control	Bdnf+Rapa				control	Bdnf+Rapa
pS6/Area	2.36318	1.99203			gfp length/slice width	0.222949	0.188471
	7.11098	2.51884				0.148013	0.160267
	16.4747					0.200192	0.174309
						0.197864	0.202486
						0.18745	0.20045
						0.243525	0.193677
						0.310275	0.196859
						0.246697	0.206133
						0.238807	0.13155
						0.197846	0.0903721
						0.100352	0.153405
						0.208288
						0.201704
						0.257578
						0.145912
						0.248721
						0.208629
						0.175631
						0.227782
						0.209834
						0.0783703

## Sheet: figure 2 -s1 - source data 1D
				control	Rapamycin	BDNF
				0.949912	0.524978	0.465102
		gfp length/slice width		0.963751	0.738854	0.260037
				0.970961	0.577498	0.264361
				0.923143	0.600769	0.22954
				0.902103	0.531303	0.164962
				0.928114	0.63059	0.233376
				0.833932	0.648132	0.159375
				0.909025	0.728885	0.150781
				0.858579	0.771861	0.142187
				0.911219	0.659001	0.0739191
				0.859788	0.695251	0.171548
				0.877049	0.674889	0.131799
					0.804766	0.147975
					0.738991	0.15109
					0.731848	0.111371
					0.662988	0.278772
					0.646403	0.16624
					0.683131	0.302643
					0.74373	0.355814
					0.677881	0.329457
					0.651676	0.26124
					0.585349	0.211927
					0.637633	0.247706
					0.521895	0.180734
					0.630124	0.142794
					0.527843	0.0925518
						0.193918
						0.208193
