# Supplementary material for: mTOR signaling regulates the morphology and migration of outer radial glia in developing human cortex
Source: eLife. 2020 Sep 2;9:e58737. doi: 10.7554/eLife.58737 (PMC7467727; doi:10.7554/eLife.58737)
Supplement: Figure 2—figure supplement 2—source data 1. [file elife-58737-fig2-figsupp2-data1.xlsx]

## Sheet: figure 2- s2 - source data1A
	Sox2 VZ
gfp process length	vehicle	rapamycin	BDNF	3BDO
	56.6	69.7	71.3	88.7
	107	31.8	73.5	141
	36.5	70.9	41.1	144
	106	69.8	60.5	57.6
	95.2	35.5	233	97
	140	41.9	230	107
	52.8	46.9	50.6	100
	180	63.8	151	94.3
		29.6
	288	187	139	140
	255	92.2	239	52.1
	118	125	243	70.9
	152	106	154	190
			132	223
		99.6
		88.7
		99
		158

## Sheet: figure 2- s2 - source data1B
	Hopx oSVZ
gfp process length	vehicle	rapamycin	BDNF	3BDO
	154	60.4	55.7	52.6
	125	49.9	77.8	22.9
	290	125	173	30.1
	163	79.9	105	65.4
	344	25.7	146	155
	183	29.8	96.5	107
	338	54.5	186	185
	290	30.1	88.6	104
		92.4
	224	97.1	108	115
	248	181	84.8	172
	198	65.5	89.8	168
	233	196	88.1	107
			196	120
		270
		169
		93
		66.9

## Sheet: figure 2- s2 - source data1C
	Tbr2
gfp process length	vehicle	rapamycin	BDNF	3BDO
	25.8	24.8	20.5	13.4
	36	8.06	18	20.2
	37	14.1	6.23	4.4
	11.7	11.1	15	15.7
	14.5	16.4	12	33.5
	13.3	8.9	17.2	32.9
	8.28	10.5	19.2	28.3
	7.63	24.9	45.2	31.4
		19.4
	9.54	16.5	27.8	66.7
	25.4	14.3	12.3	13.2
	13.7	15.8	15.2	28.4
	51.4	17.8	36.3	16.9
			9.99	24.2
		10.3
		14.2
		26.2
		21.6

## Sheet: figure 2- s2 - source data1D
	Cryab VZ
gfp process length	vehicle	rapamycin	BDNF	3BDO
	62.3	184	121	91.2
	106	32.9	69.1	59.6
	129	101	131	175
	156	59.2	110	68
	165	63.4	145	111
	107	112	107	103
	46.8	78.6	94.3	73.2
	10.1		117	64.4

## Sheet: figure 2- s2 - source data1E
	orientation of primary process						Number of primary processes
	vehicle	rapamycin	BDNF	3BD0			vehicle	rapamycin	BDNF	3BD0
	90	48	78	0			1	3	3	4
	61	59	19	48			1	4	5	4
	50	90	75	58			1	3	4	4
	82	90	25	28			1	6	2	6
	56	90	23	75			1	4	2	1
	59	8	63	70			4	5	4	5
	42	90	8	79			1	1	4	3
	52		73	31			2		4	3
		50	72	15				1	3	3
	87	23	51	50			2	3	5	5
	61	65		0			2	2
	62	30	55				1	3	3	2
	53	50	80	20			3	3	4	3
	89	5	50	46			1	3	1	3
	78		46	52			3		1
	80	0	46				2	3	1	3
	69	0	0	90			2	2	1	3
	76	90	44	38			1	4	3	2
				28
	76	25	51				1	3	1
	85	70	10				2	1	6
	56	66	25				2	5	4
	65	53	56				4	3	1
		50	17				5	2	5
	63	45	52				1	2	4
	65	61	50				2	3	5
	58		73				1		6
