# Supplementary material for: mTOR signaling regulates the morphology and migration of outer radial glia in developing human cortex
Source: eLife. 2020 Sep 2;9:e58737. doi: 10.7554/eLife.58737 (PMC7467727; doi:10.7554/eLife.58737)
Supplement: Figure 2—figure supplement 3—source data 1. [file elife-58737-fig2-figsupp3-data1.xlsx]

## Sheet: Figure 2 - s3 - source data1A
	SOX2					TBR2					HOPX					SATB2
% Cells of total	control	rapamycin	BDNF	3BDO		control	rapamycin	BDNF	3BDO		control	rapamycin	BDNF	3BDO		control	Rapa	BDNF
	35.1354	27.7434	29.403	32.2391		6.85075	31.0494	26.4706	12.3447		29.798	21.3554	17.0675	17.6289		62.5899	41.9239	44.1613
	54.5506	34.0072				11.3268	18.0269	21.541			28.609	13.5213	32.5634	15.4602		10.0247	63.3579	60.5997
			24.1095	69.1855		12.917	6.52698	17.6278	30.6602		23.1722	27.2057	15.1501	28.2014		33.0159	17.3711	24.3348
	19.0241	45.4201				2.37389	13.225				37.0676	31.9241	19.7816
			38.2095	58.2877			18.2003	21.6555	31.8314		14.1975	24.7691
	28.2355					11.9776					18.4831	5.38892
		25.1073				26.4262	13.5125	18.4507			14.5253
		44.9035				26.9914	12.9365					24.2468
		33.9792				41.0418	14.2651				13.6802	14.5697
	45.614	33.526					18.9205				18.9248	12.9232
												23.2074
	45.4794	55.354				11.7388	21.6205				21.3795
												22.6541
	42.747	50.76				24.002	28.3265				14.9418
												23.7107
		35.9415				25.0542	19.2247				21.3238
												8.27601
											20.1899

## Sheet: Figure 2 - s3 - source data1B
	SOX2					HOPX					TBR2					CTIP2					CUX1
Number of cells/area	control	rapamycin	BDNF	3BDO		control	rapamycin	BDNF	3BDO		control	rapamycin	BDNF	3BDO		control	rapamycin	BDNF	3BDO		control	rapamycin	BDNF	3BDO
	189.802	189.802	150.036	188.932		119.049	95.7685	40.7192	36.0644		41.8781	29.2495	9.63069	87.2801		25.7865	113.182	72.8369	294.162		58.4103	211.21	243.793	127.171
	110.691	110.691	154.85	215.092		65.5458	94.8359	84.8644	61.417		20.7782	41.6463	23.4204	66.3955		34.9528	265.415	202.833	118.132		150.889	304.485	384.479	199.741
	155.686	155.686	199.348	285.942		73.737	69.652	58.8162	5.92554		48.5994	40.6486	45.7995	92.1255		46.5154	123.979	85.6795	231.386		130.809	247.756	323.873	272.996
	116.784	116.784	143.171	281.194		66.2025	76.2574	41.5657	34.811		25.1049	58.0171	25.5371	93.5518		200.819	137.869	228.854	269.952		125.743	494.068	267.788	207.614
	165.795	165.795	204.726	223.822		18.9545	112.419	97.1751	53.2561		35.3969	43.4038	0	49.509		142.972	139.895	84.5463	276.513		373.789	435.4	350.394	359.748
	190.715	190.715	71.1434	217.94		49.6736	109.819	30.4395	95.919		34.5122	47.4764	11.3263	92.3106		106.122	109.212	119.682	224.698		211.712	464.687	273.808	267.444
	143.429	143.429	90.8998	188.052		63.8838	71.7827	66.5328	47.2708		25.5535	46.6588	6.14474	72.8858		151.914	181.677	54.5569	293.353		230.005	255.1	258.664	359.401
	119.805	119.805	107.176	195.105		64.1424	69.2691	53.5879	11.2112		20.0037	58.376	14.4382	90.3263		245.841	310.26	81.6359	30.5025		335.797	315.131	170.269	62.4006
	166.326	166.326	164.499	283.778		59.1612	71.1177	86.4505	43.5126		19.9799	70.3383	35.8184	102.204		209.444	306.191	163.632	54.6188		257.683	272.841	382.799	52.3819
	154.199	154.199	57.8724	247.019		64.7962	65.9856	30.3775	65.3689		22.1455	47.7687	3.10427	64.8635		163.507	205.056	32.4488	54.5267		295.341	271.587	241.249	126.936
	179.584	179.584	119.133	259.308		54.8549	85.3859	74.2257	90.0492		24.1623	56.2156	11.6341	70.083		165.87	321.506	30.1466	13.1281		319.198	353.439	257.188	170.665
	181.601	181.601	62.831	220.822		82.9358	78.9383	97.8948	14.9769		48.8218	36.0935	21.2815	107.976		111.553	347.334	271.51	79.6493		304.936	338.764	268.513	160.785
	231.354	231.354	124.695	207.557		117.255	80.8978	86.6305	50.7082		75.453	68.9566	33.4709	97.1756		175.583	213.165	74.0143	42.4516		262.933	255.194	198.566	143.491
	223.55	223.55	142.106	212.911		114.135	70.4033	64.7001	29.9046		78.8672	34.0793	27.5611	96.692		72.1355	243.666	181.283	112.791		363.077	241.678	301.236	254.003
	160.902	160.902	135.86	175.689		62.2981	125.987	101.587	49.6551		41.0507	5.07856	10.4666	69.7774		155.855	340.132	268.423	150.39		225.156	315.286	281.195	269.154
	167.56	167.56	205.141	218.295		84.5934	60.3666	107.138	73.2942		42.5001	3.42549	43.8105	71.5158		183.178	255.005	376.195	23.5606		180.854	299.637	317.469	301.853
	194.756	194.756	202.311	177.65		61.347	96.4845	94.6905	27.3011		66.5993	1.32711	36.6973	70.842		175.946	248.26	370.57	122.223		162.961	340.338	264.983	440.094
	94.1869	94.1869	222.379	155.791		81.0663	56.8761	78.204	75.9363		0.391733	0	20.534	39.3235		178.231	240.135	197.179	147.651		162.8	317.132	294.307	235.092
	100.284	100.284	159.644	240.812		88.9234	92.1261	103.994	44.5975		7.31214	0.572366	7.94996	71.7754		223.312	231.614	179.327	162.835		361.822	107.403	268.067	270.017
	60.8062	60.8062	109.69	234.504		46.1819	46.5524	38.3519	38.1349		0.407529	1.94961	0.397429	86.9895		95.4591	268.959	262.145	21.4255		269.061	155.665	264.533	198.254
	142.228	142.228	125.073	229.449		74.9853	32.3635	53.0112	7.77659		0.666424	3.37431	0	89.4786		72.3528	287.753	232.22	247.417		122.417	209.194	245.109	404.36
	86.9657	86.9657	164.948	194.814		52.8148	92.5935	86.0173	86.1301		3.12039	5.41092	0.977469	66.2007		179.251	390.693	344.773	154.307		103.361	289.091	320.023	247.478
	153.5	153.5	147.167	139.758		73.3066	46.0495	87.3352	52.6212		36.3542	3.99748	2.65383	5.95868		311.177	395.018	303.336	47.472		239.302	286.701	273.916	199.857
	149.595	149.595	106.072	83.1176		65.1612	91.4059	36.6473	60.1608		14.2203	1.18093	2.27623	0		285.051	162.639	153.667	92.6349		345.753	192.894	117.186	330.203
	105.045	105.045	201.879	114.06		60.8455	65.4325	124.492	79.6533		5.92225	1.26627	2.88399	14.7606		364.449	185.252	135.02	201.163		281.866	179.825	106.227	305.346
	208.417	208.417	265.508	173.482		132.871	45.2689	120.002	105.048		0.767566	2.52761	3.22154	19.3508		282.938	112.948	207.124	96.3482		234.804	182.83	219.697	256.351
	279.53	279.53	192.5	265.166		116.471	93.1611	67.3354	45.4214		7.17626	1.76912	1.84842	18.6805		330.024	119.744	189.301	223.101		290.909	167.369	254.539	210.114
	189.973	189.973	147.751	47.372		100.167	89.4387	64.8066	148.025		4.39274	8.91223	20.1756	18.6701		252.366	200.128	280.444	153.054		187.069	132.538	281.418	262.443
	290.754	290.754	80.4993	251.978		146.998	58.2232	50.5881	114.433		0.564639	3.95024	5.21941	9.82043		358.251	211.893	195.335	192.212		295.509	136.012	224.49	296.873
	174.392	174.392	81.9336	252.251		104.108	94.8248	51.6372	90.3973		1.02586	13.1844	2.85815	12.0847		333.301	141.957	208	104.463		367.38	228.01	294.777	203.008
	218.139	218.139	148.347	182.164		64.7453	115.29	80.5119	63.3403		0.208961	4.67442	6.89467	27.1337		319.53	186.887	257.639	35.7864		379.937	300.151	297.116	130.294
	167.01	167.01	152.118	104.387		68.5276	124.073	116.725	16.9275		0.990768	5.60819	4.68777	66.3202		311.891	195.198	53.4275	132.76		351.548	192.765	203.321	143.037
	235.708	235.708	214.155	38.3357		191.408	89.5705	140.041	38.4502		20.6548	63.7793	11.0617	30.1216		402.008	124.06	186.556	71.9606		283.784	174.123	225.421	104.485
	211.628	211.628	293.217	139.866		64.0036	141.354	50.2206	113.059		4.93161	8.77573	47.6502	13.4368		257.601	283.147	261.274	187.434		359.455	290.091	256.919	202.454
	83.8201	83.8201	278.083	224.468		41.3096	67.1174	51.8771	32.7163		0.795384	16.2408	80.4737	0		274.418		175.841	192.926		183.109		161.137	200.653
	146.876	146.876	274.998	40.3434		72.0444	169.246	9.01288	127.872		0.578801	22.7891	66.2342	58.8228		383.918		162.631	178.913		277.344		225.181	48.2535
	272.817	272.817	140.662	191.709		108.769	116.138	20.2067	115.941		29.2043	15.0284	27.2692	54.7752		467.612		252.267	144.706		246.85		194.421	67.3773
	156.853	156.853	188.595	238.792		57.652	153.81	12.8448	71.9276		12.5687	120.892	25.078	29.9256		344.904		147.327	130.041		424.423		135.432	119.534
	299.626	299.626	161.205	187.503		153.575	138.416	5.83171	28.1225		0.375382	81.6197	39.5723	33.7333				260.991	103.5		278.303		137.5	165.942
	106.758	106.758	282.37	74.9933		78.8516	57.5162	24.9082	10.1282		60.5015	69.8804	64.0163	57.4861				253.235					313.642
	156.211	156.211	286.37	173.42		63.7414	74.1565	9.1873	32.8953		133.805	44.0336	47.1093	24.3108				113.317					175.738
	198.014	198.014	224.791	84.751		82.9595	31.0657	65.6367	35.1102		117.537	31.2941	65.6367	63.4064				230.523					160.398
	318.125	318.125	239.317	134.015		107.324	43.7037	13.7678	34.7312		78.7316	29.2463	27.1307	67.4962				111.428					113.252
	118.048	118.048	122.383	185.931		51.9826	44.8763	12.313	8.653		48.9453	77.8882	27.7975	83.8641				104.319					144.642
	265.327	265.327	273.303	96.2131		51.0988	124.443	22.6377	12.995		66.5176	40.646	58.2448	32.4617				195.781					127.09
	270.815	270.815	60.6087	188.203		93.4794	41.9621	12.8564	87.6992		64.0138	38.0622	16.897	71.9751				201.038					155.421
	347.547	347.547	161.196	153.359		44.0977	31.1161	42.9066	11.8118		97.2558	33.339	47.1735	62.7279				50.7889					147.147
	153.267	153.267		255.372		83.2427	38.9612		59.7483		39.2037	53.335		40.478				342.23					197.068
	159.352	159.352		163.955		62.7876	37.8228		9.30908		80.2227	23.6019		37.9691				140.823					168.003
	161.436	161.436		244.307		54.4351	10.0444		12.4956		45.8618			52.1617				169.119					232.263
	285.131	285.131		202.429		71.626	29.1326		15.0716		60.5407							121.161					231.035
	107.414	107.414		149.209		44.6424	36.0811		46.6332		92.4061							318.969					294.019
	181.709	181.709		146.27		46.8771			29.7747		120.941							141.18					188.46
	127.906	127.906		186.931		35.2606
	155.543	155.543				19.0936
	179.47	179.47				45.1147
	425.02	425.02				62.1981
