# Supplementary material for: mTOR signaling regulates the morphology and migration of outer radial glia in developing human cortex
Source: eLife. 2020 Sep 2;9:e58737. doi: 10.7554/eLife.58737 (PMC7467727; doi:10.7554/eLife.58737)
Supplement: Figure 2—figure supplement 4—source data 1. [file elife-58737-fig2-figsupp4-data1.xlsx]

## Sheet: Figure 2 - s4 - source data1A
	HOPX LENGTH BY LINE													HOPX COUNTS BY LINE
	13234-control	H1-control	H28126-control	13234-rapamycin	H1-rapamycin	H28126-rapamycin	13234-BDNF	H1-BDNF	H28126-BDNF	13234-3BD0	H1-3BD0	H28126-3BD0		13234-control	H1-control	H28126-control	13234-rapamycin	H1-rapamycin	H28126-rapamycin	13234-BDNF	H1-BDNF	H28126-BDNF	13234-3BD0	H1-3BD0	H28126-3BD0
	48.6	30.5	37.7	10.4	13.2	41.5	11.5	44.1	15.7	8.7	49.9	10.7		119.049	81.0663	51.9826	95.7685	125.987	74.1565	40.7192	97.8948	50.2206	39.4338	86.1301	10.1282
	65.7	37.1	38.5	33.3	20.8	8.1	4.2	13.5	20.1	6.4	12.5	8.1		65.5458	88.9234	51.0988	94.8359	60.3666	31.0657	84.8644	86.6305	51.8771	36.0644	52.6212	32.8953
	30.1	28.2	30.4	15.5	35.2	12.3	5.4	11.4	11.7	5.1	7.1	11.2		73.737	46.1819	93.4794	69.652	96.4845	43.7037	58.8162	64.7001	9.01288	61.417	60.1608	35.1102
	37.7	10.4	55.6	10.9	27.3	16.3	23	18.9	26.4	7.1	19.9	10.1		66.2025	74.9853	44.0977	76.2574	56.8761	44.8763	41.5657	101.587	20.2067	5.92554	79.6533	34.7312
	26.1	11.8	21.7	28.4	11.3	12.2	9.1	39.5	14.1	4	32.2	3.2		18.9545	52.8148	83.2427	112.419	92.1261	124.443	97.1751	107.138	12.8448	34.811	105.048	8.653
	35	7.3	35.8	39.6	7.9	23.3	13.1	25.4	7.2	8.3	19.4	3.6		49.6736	73.3066	62.7876	109.819	46.5524	41.9621	30.4395	94.6905	5.83171	53.2561	45.4214	12.995
	31.9	30.4	28.6	20.4	14	14.5	13.7	33.4	27.3	7.4	19	16.7		63.8838	65.1612	54.4351	71.7827	32.3635	31.1161	66.5328	78.204	24.9082	95.919	148.025	87.6992
	19.1	20.2	49	13.2	31.4	12.9	9.6	11.4	12.6	8.6	44.6	12.9		64.1424	60.8455	71.626	69.2691	92.5935	38.9612	53.5879	103.994	9.1873	47.2708	114.433	11.8118
	34.1	8.1	26.4	14.6	20.5	6.1	6.8	16.4	8.6	4.2	18.3	25		59.1612	132.871	44.6424	71.1177	46.0495	37.8228	86.4505	38.3519	65.6367	11.2112	90.3973	59.7483
	72.3	30.1	37	5.4	27.2	5.1	8.1	22	10.8	4	34.3	58.9		64.7962	116.471	46.8771	65.9856	91.4059	10.0444	30.3775	53.0112	13.7678	43.5126	63.3403	9.30908
	31.6	41.8	52.9	8.6	7.1	7.4	3	29.2	26.6	3.2	24.4	35		54.8549	100.167	35.2606	85.3859	65.4325	29.1326	74.2257	86.0173	12.313	65.3689	16.9275	12.4956
	25.3	37.4	48.3	5.4	22.4	4	7.1	41	9.5	10.1	8.6	25		82.9358	146.998	19.0936	78.9383	45.2689	36.0811		87.3352	22.6377	90.0492	38.4502	15.0716
	41.8	10.9	58.6	6.4	12.8	16.9	24.6	20.1	10.1	17.6	58.4	22.2		117.255	104.108	45.1147	80.8978	93.1611			36.6473	12.8564	14.9769	113.059	46.6332
	35.7	18.2	20.7	5.1	4.5	26.3	21.2	45.1	60.4	15.2	22.6	7.9		114.135	64.7453	62.1981	70.4033	89.4387			124.492	42.9066	50.7082	32.7163	29.7747
	62.8	25.3	39.3	18.6	9.6	21.4	20.8	32.7	20.7	12.9	16.3	7.1		62.2981	68.5276			58.2232			120.002		29.9046	127.872
	27.2	18.8	62	9.1	7.3	60	4.5	26.4	55	5.2	15.7	5.1		84.5934	191.408			94.8248			67.3354		49.6551	115.941
	35.4	21.9	30.1	3	6.8	14.9	7.1	41.9	11.5	5.7	24.4	9.6		61.347	64.0036			115.29			64.8066		73.2942	71.9276
	41.9	49.6	33.3	13.2	16.2	38	3.6	29.2	9	5.2	4.5	4.5			41.3096			124.073			50.5881		27.3011	28.1225
	66.9	51.5	18.6	6.9	60.6	2.8	11.1	27	21.6	12.3	65.5	28.6			72.0444			89.5705			51.6372		75.9363
	37.4	18.6	5.1	53.3	15.4	11.5	17.2	11.1	8.6	8.1	30.1	23.4			108.769			141.354			80.5119		44.5975
	25.5	37.1	31	8.3	10.1	4.5	8.1	12.4	12.9	5.9	33.6	4			57.652			67.1174			116.725		38.1349
	34.4	12.1	45.6	7.9	49.5	27.2	21.3	33.4	13.4	5.1	22.7	29.4			153.575			169.246			140.041		7.77659
	15.7	15	21.7	3.2	27.2	14.2	8	28.8	7.9	6.5	23	17.9			78.8516			116.138
	14.1	12.3	22.8	5.1	15.2	25.1	14	9.3	25.1	4.3	38.4	3.6			63.7414			153.81
	27.7	44	43.6	18.6	25.3	16.4	26.7	26.3	10.9	2.3	24.3	25.8			82.9595			138.416
	25.3	42.9	11.1	7.3	21.4	7.1	20.3	33.8	11.2	1.4	10.1	12.3			107.324			57.5162
	23.4	40.3	14.7	3.2	10	4.5	16.8	24.2	8	2	16.7	20.1
	76.2	51	12.1	20.1	36.4	37.1	16.2	30.7	23.5	2.9	35.7	33
	33.1	50.2	11.8	10.7	28.1	34.7	25.3	49.9	12.7	5.1	24.8	19.6
	13.2	31.9	10.1	13.6	31.1	9	8.1	39.3	7.3	8.1	39.2	11.1
	17.2	43.6	35.4	23	16.3	5.4	27.2	28.2	32.2	11.5	13.5	6.1
	35.5	63.2	35.1	21.3	35	4.3	19.2	11.1	13.1	8.7	13.6	4
	16	31.1	9.3	15.8	17.6	5	17.4	24.3	7.3	3	14.6	5.4
	23.6	33.6	5.7	18.2	10.9	5		21.3	42.9	11.3	73.7	4
	26.7	33.9	3.6	7.1	20.2	7		17.6	16.2	9	45.9	5.4
	35.4	28.1	35.8	10.2	9.1	7.2		22.7	15.2	1	8.7	7.9
	66.5	38.1	10.4	5.7	33.3			25.6	12.1	6.5	36	14.1
	35.5	38.9	12.2	8.1	73.9			17.9	6.4	6.1	36.5	15.8
	52.6	64.2	14.4	6.1	51			8.3	4	20.8	50	15
	60.5	26.7	60.1	9.6	40.9			11.8	13.7	3.2	17.2	15.2
	35.9	26.7	20.2	9.5	35.7			12.2	12.6	7.1	37.1	6.8
	28.3	38.9	25.6	8.6	33.9			12.7	3	1	16	10.3
	40.7	80.2			38.5			16.2		6.1	53.2
	36	45.3			46.1			13.5		1	49.5
	36.5	24			34.5			22.8		5.1	56.3
	42.5	55.8			17.3			47.8		15	52
	44.9	41.4			25.8			36.9		3.2	26.9
	26.3	38.2			20.7			25.6		9.5	41.6
	21.2	43.9			37.9			81.5		3	20.5
	32.6	20.6			23.9			11.2		6.4	12.1
	26.3	51.3			62.9			15.7		3.6	7.7
		11.3			47.7			22.7		9.6	5.1
		24.4			23.2			15.7		5.1	24.3
		29.4			27.9			20.7		9.3	11.1
		22.7			37			21.7		5.1
		29.7			37.8			17.8		5.2
		50.6			39			30.6		5.9
		57.9			23.2			12.9		22.4
		38.5			16.2			15.7		7.1
		33			36			15.3		6.1
		13.1			19.3			34.2		3
		31.4			21.5			23.5		8.3
		20.8			19.5			24.5		6.4
		35.2			22			39.2		4.5
		28.7			39.3			33.7		3.6
		26.7			22.5			20.7		7.1
		6.4			27.6
		9.3			19
		6.1			21.3
		24.4			49.7
		42.1			34.1
		16.6			20.4
		28.6			18.1
		23.3			23.5
		35.4			33.1
		30.3			14.6
		46.6			30.8
		39.8			11.5

## Sheet: Figure 2 - s4 - source data1B
	SOX2 COUNTS BY LINE													TBR2 COUNTS BY LINE
	13234-control	H1-control	H28126-control	13234-rapamycin	H1-rapamycin	H28126-rapamycin	13234-BDNF	H1-BDNF	H28126-BDNF	13234-3BD0	H1-3BD0	H28126-3BD0		13234-control	H1-control	H28126-control	13234-rapamycin	H1-rapamycin	H28126-rapamycin	13234-BDNF	H1-BDNF	H28126-BDNF	13234-3BD0	H1-3BD0	H28126-3BD0
	189.802	94.1869	118.048	124.546	164.272	328.013	150.036	62.831	293.217	188.932	139.758	173.42		41.8781	0	60.5015	29.2495	5.07856	120.892	9.63069	21.2815	47.6502	87.2801	5.95868	54.7752
	110.691	100.284	265.327	182.429	74.5587	309.499	154.85	124.695	278.083	215.092	83.1176	84.751		20.7782	0.391733	133.805	41.6463		81.6197	23.4204	33.4709	80.4737	66.3955	0	29.9256
	155.686	60.8062	270.815	119.968	151.863	265.409	199.348	142.106	274.998	285.942	114.06	134.015		48.5994	7.31214	117.537	40.6486	3.42549	69.8804	45.7995	27.5611	66.2342	92.1255	14.7606	33.7333
	116.784	142.228	347.547	202.84	204.185	163.493	143.171	135.86	140.662	281.194	173.482	185.931		25.1049	0.407529	78.7316	58.0171	1.32711	44.0336	25.5371	10.4666	27.2692	93.5518	19.3508	57.4861
	165.795	86.9657	153.267	201.922	183.867	107.573	204.726	205.141	188.595	223.822	265.166	96.2131		35.3969	0	48.9453	43.4038	0	31.2941	0	43.8105	25.078	49.509	18.6805	24.3108
	190.715	153.5	159.352	189.906	127.828	217.44	71.1434	202.311	161.205	217.94	47.372	188.203		34.5122	0.666424	66.5176	47.4764	0.572366	29.2463	11.3263	36.6973	39.5723	92.3106	18.6701	63.4064
	143.429	149.595	161.436	168.45	61.6077	182.196	90.8998	222.379	282.37	188.052	251.978	153.359		25.5535	3.12039	64.0138	46.6588	1.94961	77.8882	6.14474	20.534	64.0163	72.8858	9.82043	67.4962
	119.805	105.045	285.131	177.083	224.678	348.545	107.176	159.644	286.37	195.105	252.251	255.372		20.0037	36.3542	97.2558	58.376		40.646	14.4382	7.94996	47.1093	90.3263	0	83.8641
	166.326	208.417	107.414	366.499	151.447	217.122	164.499	109.69	224.791	283.778	182.164	163.955		19.9799	14.2203	39.2037	70.3383	3.37431	38.0622	35.8184	0.397429	65.6367	102.204	0	32.4617
	154.199	279.53	181.709	186.824	247.356	155.796	57.8724	125.073	239.317	247.019	104.387	244.307		22.1455	5.92225	80.2227	47.7687	5.41092	33.339	3.10427	0	27.1307	64.8635	12.0847	71.9751
	179.584	189.973	127.906	196.851	195.456	213.564	119.133	164.948	122.383	259.308	38.3357	202.429		24.1623	0.767566	45.8618	56.2156	3.99748	53.335	11.6341	0.977469	27.7975	70.083	27.1337	62.7279
	181.601	290.754	155.543	162.81	170.25	225.71		147.167	273.303	220.822	139.866	149.209		48.8218	7.17626	60.5407	36.0935	1.18093	23.6019		2.65383	58.2448	107.976	66.3202	40.478
	231.354	174.392	179.47	271.117	235.707			106.072	60.6087	207.557	224.468	146.27		75.453	4.39274	92.4061	68.9566	1.26627			2.27623	16.897	97.1756	30.1216	37.9691
	223.55	218.139	425.02	156.52	257.622			201.879	161.196	212.911	40.3434	186.931		78.8672	0.564639	120.941	34.0793	2.52761			2.88399	47.1735	96.692	0	52.1617
	160.902	167.01			180.166			265.508		175.689	191.709			41.0507	1.02586						3.22154		69.7774	0
	167.56	235.708			155.329			192.5		218.295	238.792			42.5001	0.208961			1.76912			1.84842		71.5158	13.4368
	194.756	211.628			221.668			147.751		177.65	187.503			66.5993	0.990768			8.91223			20.1756		70.842	0
		83.8201			150.827			80.4993		155.791	74.9933				20.6548			3.95024			5.21941		39.3235	58.8228
		146.876			148.587			81.9336		240.812					4.93161			13.1844			2.85815		71.7754
		272.817			261.393			148.347		234.504					0.795384			4.67442			6.89467		86.9895
		156.853			98.9574			152.118		229.449					0			5.60819			4.68777		89.4786
		299.626			295.844			214.155		194.814					0.578801			63.7793			11.0617		66.2007
		106.758			176.822										29.2043			8.77573
		156.211			261										12.5687			16.2408
		198.014			204.541										0.375382			22.7891
		318.125			63.2678										0			15.0284

## Sheet: Figure 2 - s4 - source data1C
	CTIP2 COUNTS BY LINE													CUX1 COUNTS BY LINE
	13234-control	H1-control	H28126-control	13234-rapamycin	H1-rapamycin	H28126-rapamycin	13234-BDNF	H1-BDNF	H28126-BDNF	13234-3BD0	H1-3BD0	H28126-3BD0		13234-control	H1-control	H28126-control	13234-rapamycin	H1-rapamycin	H28126-rapamycin	13234-BDNF	H1-BDNF	H28126-BDNF	13234-3BD0	H1-3BD0	H28126-3BD0
	25.7865	155.855	311.177	113.182	181.677	162.639	72.8369	271.51	252.267	294.162	30.5025	132.76		58.4103	180.854	345.753	211.21	255.1	192.894	243.793	268.513	194.421	127.171	62.4006	143.037
	34.9528	183.178	285.051	265.415	310.26	185.252	202.833	74.0143	147.327	118.132	54.6188	71.9606		150.889	162.961	281.866	304.485	315.131	179.825	384.479	198.566	135.432	199.741	52.3819	104.485
		175.946	364.449	123.979	306.191	112.948	85.6795	181.283	260.991	231.386	54.5267	187.434		130.809	162.8	234.804	247.756	272.841	182.83	323.873	301.236	137.5	272.996	126.936	202.454
	46.5154	178.231	282.938	137.869	205.056	119.744	228.854	268.423	253.235	269.952	13.1281	192.926		125.743	361.822	290.909	494.068	271.587	167.369	267.788	281.195	313.642	207.614	170.665	200.653
	200.819	223.312	330.024	139.895	321.506	200.128	84.5463	376.195	113.317	276.513	79.6493	178.913		373.789	269.061	187.069	435.4	353.439	132.538	350.394	317.469	175.738	359.748	160.785	48.2535
	142.972	95.4591	252.366	109.212	347.334	211.893	119.682	370.57	230.523	224.698	42.4516	144.706		211.712	122.417	295.509	464.687	338.764	136.012	273.808	264.983	160.398	267.444	143.491	67.3773
	106.122	72.3528	358.251		213.165	141.957	54.5569	197.179	111.428	293.353	112.791	130.041		230.005	103.361	367.38		255.194	228.01	258.664	294.307	113.252	359.401	254.003	119.534
	151.914	179.251	333.301		243.666	186.887	81.6359	179.327	104.319		150.39	103.5		335.797	239.302	379.937		241.678	300.151	170.269	268.067	144.642		269.154	165.942
	245.841		319.53		340.132	195.198	163.632	262.145	195.781		23.5606			257.683		351.548		315.286	192.765	382.799	264.533	127.09		301.853
	209.444		311.891		255.005	124.06	32.4488	232.22	201.038		122.223			295.341		283.784		299.637	174.123	241.249	245.109	155.421		440.094
	163.507		402.008		248.26	283.147	30.1466	344.773	50.7889		147.651			319.198		359.455		340.338	290.091	257.188	320.023	147.147		235.092
	165.87		257.601		240.135			303.336	342.23		162.835			304.936		183.109		317.132			273.916	197.068		270.017
	111.553		274.418		231.614			153.667	140.823		21.4255			262.933		277.344		107.403			117.186	168.003		198.254
	175.583		383.918		268.959			135.02	169.119		247.417			363.077		246.85		155.665			106.227	232.263		404.36
	72.1355		467.612		287.753			207.124	121.161		154.307			225.156		424.423		209.194			219.697	231.035		247.478
			344.904		390.693			189.301	318.969		47.472					278.303		289.091			254.539	294.019		199.857
					395.018			280.444	141.18		92.6349							286.701			281.418	188.46		330.203
								195.335			201.163										224.49			305.346
								208			96.3482										294.777			256.351
								257.639			223.101										297.116			210.114
								53.4275			153.054										203.321			262.443
								186.556			192.212										225.421			296.873
								261.274			104.463										256.919			203.008
								175.841			35.7864										161.137			130.294
								162.631													225.181
