# Supplementary material for: mTOR signaling regulates the morphology and migration of outer radial glia in developing human cortex
Source: eLife. 2020 Sep 2;9:e58737. doi: 10.7554/eLife.58737 (PMC7467727; doi:10.7554/eLife.58737)
Supplement: Figure 2—figure supplement 5—source data 1. [file elife-58737-fig2-figsupp5-data1.xlsx]

## Sheet: Figure 2 - s4 - source data1A
	BRDU					pHH3
	control	Rapa	BDNF	3BDO		control	rapamycin	BDNF	3BDO
% Cells/total	15.7761	13.3282	7.66082	20.6593		7.26496	2.44908	3.0117	5.78103
			18.5688			3.24427	1.90531	5.3945
	50.5082	29.5908	54.5795	17.5096			5.34155	13.9208	2.92561
						2.85887
	11.6445	22.7291	26.9525	45.2835			2.15954	8.0093	13.4184
						8.72316
	20.7867	51.5412	38.7994				10.2912	4.97804
						1.84343
						3.95762

## Sheet: Figure 2 - s4 - source data1B
	control	rapamycin
cells/area	6.91036	2.01998
	12.1298	5.15912
	0.417012	10.1291
	8.68548	3.86572
	3.87497	1.26816
	3.76458	5.38522
	5.01037	3.29309
	3.93322	1.15704
	10.4185	1.14592
	3.6947	1.659
	9.77564	1.79152
	16.1425	1.12451
	5.22342	1.00681
	6.94997	1.98368
	2.7629	2.38128
	2.04091	2.89135
	2.60867	2.94944
	1.26854	2.80213
	2.96391	2.31366
	4.15598
	2.98479
	2.83035
	6.09134
	8.836
	3.66042
	2.56802
	4.10764
	0.17642
	0.933389
	2.23274
	2.18571
	0.18341
	2.18353
	5.03104
	7.79735
	0.711108
	0
	0.475067
	1.34742
	3.86188

## Sheet: Figure 2 - s4 - source data1C
		Vehicle			Rapamycin
% cells of total	MST	22.2222	46.9624	8.44109	19.0476	47.1051	5.85295
	Other divisions	77.7778	91.5589	53.0376	80.9524	94.147	52.8949

## Sheet: Figure 2 - s4 - source data1D
	control	rapamycin	BDNF	3BDO
% cells/dapi	0.747384	0.491867	1.27972	1.33748
	0.986872	1.02332	1.51067	2.63652

## Sheet: Figure 2 - s4 - source data1E
	control	raptor	tsc2
% Capase+GFP+	0	0	0
	0	0	0
	0	0	0.0833333
	0.142857	0	0
	0.0714286	0	0
	0	0	0
	0	0	0.1
	0
	0
