# Supplementary material for: mTOR signaling regulates the morphology and migration of outer radial glia in developing human cortex
Source: eLife. 2020 Sep 2;9:e58737. doi: 10.7554/eLife.58737 (PMC7467727; doi:10.7554/eLife.58737)
Supplement: Figure 2—source data 1. [file elife-58737-fig2-data1.xlsx]

## Sheet: Figure2 - Source Data 1C
Treatment	control	Rapamycin	BDNF	3BDO
GFP+ Process length	0.259126	0.216434	0.108811	0.123069
	0.267504	0.151137	0.0911894	0.130792
	0.244764	0.140866	0.0814978	0.0916988
	0.216904	0.100576	0.247812	0.0736025
	0.220468	0.100576	0.100875	0.0714286
	0.161914	0.09393	0.154767	0.0565217
	0.231242	0.0496829	0.118182	0.0515528
	0.289053	0.0610465	0.119697	0.0990225
	0.275523	0.073203	0.103535	0.0841479
	0.176709	0.0881157	0.159737	0.121122
	0.216727	0.0781744	0.0946389	0.0939227
	0.209083	0.068685	0.113786	0.109264
	0.203019	0.270414	0.122756	0.0870942
	0.243914	0.0795334	0.0764331	0.0344814
	0.174294	0.0906681	0.11465	0.0912365
	0.245743	0.106371	0.213955	0.0912365
	0.272446	0.103527	0.223876	0.0560024
	0.213622	0.0932878	0.0823413
	0.229905	0.145982	0.082672
	0.332151	0.066891	0.0717663
	0.245863	0.123265	0.108484
	0.257386	0.108164	0.113491
	0.193823	0.0860634	0.0873435
	0.235004	0.109464	0.144188
	0.243024	0.108046	0.0976104
	0.171487	0.0551724	0.0635885
	0.247083	0.0547126	0.0635359
	0.14948		0.0516969
	0.204352		0.111681
	0.150899		0.103788

## Sheet: Figure 2 - Source Data 1D
Treatment	control	rapamycin	BDNF	3BDO
HOPX+ Process length	48.6	10.4	11.5	8.7
	65.7	33.3	4.2	6.4
	30.1	15.5	5.4	5.1
	37.7	10.9	23	7.1
	26.1	28.4	9.1	4
	35	39.6	13.1	8.3
	31.9	20.4	13.7	7.4
	19.1	13.2	9.6	8.6
	34.1	14.6	6.8	4.2
	72.3	5.4	8.1	4
	31.6	8.6	3	3.2
	25.3	5.4	7.1	10.1
	41.8	6.4	24.6	17.6
	35.7	5.1	21.2	15.2
	62.8	18.6	20.8	12.9
	27.2	9.1	4.5	5.2
	35.4	3	7.1	5.7
	41.9	13.2	3.6	5.2
	66.9	6.9	11.1	12.3
	37.4	53.3	17.2	8.1
	25.5	8.3	8.1	5.9
	34.4	7.9	21.3	5.1
	15.7	3.2	8	6.5
	14.1	5.1	14	4.3
	27.7	18.6	26.7	2.3
	25.3	7.3	20.3	1.4
	23.4	3.2	16.8	2
	76.2	20.1	16.2	2.9
	33.1	10.7	25.3	5.1
	13.2	13.6	8.1	8.1
	17.2	23	27.2	11.5
	35.5	21.3	19.2	8.7
	16	15.8	17.4	3
	23.6	18.2	44.1	11.3
	26.7	7.1	13.5	9
	35.4	10.2	11.4	1
	66.5	5.7	18.9	6.5
	35.5	8.1	39.5	6.1
	52.6	6.1	25.4	20.8
	60.5	9.6	33.4	3.2
	35.9	9.5	11.4	7.1
	28.3	8.6	16.4	1
	40.7	13.2	22	6.1
	36	20.8	29.2	1
	36.5	35.2	41	5.1
	42.5	27.3	20.1	15
	44.9	11.3	45.1	3.2
	26.3	7.9	32.7	9.5
	21.2	14	26.4	3
	32.6	31.4	41.9	6.4
	26.3	20.5	29.2	3.6
	30.5	27.2	27	9.6
	37.1	7.1	11.1	5.1
	28.2	22.4	12.4	9.3
	10.4	12.8	33.4	5.1
	11.8	4.5	28.8	5.2
	7.3	9.6	9.3	5.9
	30.4	7.3	26.3	22.4
	20.2	6.8	33.8	7.1
	8.1	16.2	24.2	6.1
	30.1	60.6	30.7	3
	41.8	15.4	49.9	8.3
	37.4	10.1	39.3	6.4
	10.9	49.5	28.2	4.5
	18.2	27.2	11.1	3.6
	25.3	15.2	24.3	7.1
	18.8	25.3	21.3	49.9
	21.9	21.4	17.6	12.5
	49.6	10	22.7	7.1
	51.5	36.4	25.6	19.9
	18.6	28.1	17.9	32.2
	37.1	31.1	8.3	19.4
	12.1	16.3	11.8	19
	15	35	12.2	44.6
	12.3	17.6	12.7	18.3
	44	10.9	16.2	34.3
	42.9	20.2	13.5	24.4
	40.3	9.1	22.8	8.6
	51	33.3	47.8	58.4
	50.2	73.9	36.9	22.6
	31.9	51	25.6	16.3
	43.6	40.9	81.5	15.7
	63.2	35.7	11.2	24.4
	31.1	33.9	15.7	4.5
	33.6	38.5	22.7	65.5
	33.9	46.1	15.7	30.1
	28.1	34.5	20.7	33.6
	38.1	17.3	21.7	22.7
	38.9	25.8	17.8	23
	64.2	20.7	30.6	38.4
	26.7	37.9	12.9	24.3
	26.7	23.9	15.7	10.1
	38.9	62.9	15.3	16.7
	80.2	47.7	34.2	35.7
	45.3	23.2	23.5	24.8
	24	27.9	24.5	39.2
	55.8	37	39.2	13.5
	41.4	37.8	33.7	13.6
	38.2	39	20.7	14.6
	43.9	23.2	15.7	73.7
	20.6	16.2	20.1	45.9
	51.3	36	11.7	8.7
	11.3	19.3	26.4	36
	24.4	21.5	14.1	36.5
	29.4	19.5	7.2	50
	22.7	22	27.3	17.2
	29.7	39.3	12.6	37.1
	50.6	22.5	8.6	16
	57.9	27.6	10.8	53.2
	38.5	19	26.6	49.5
	33	21.3	9.5	56.3
	13.1	49.7	10.1	52
	31.4	34.1	60.4	26.9
	20.8	20.4	20.7	41.6
	35.2	18.1	55	20.5
	28.7	23.5	11.5	12.1
	26.7	33.1	9	7.7
	6.4	14.6	21.6	5.1
	9.3	30.8	8.6	24.3
	6.1	11.5	12.9	11.1
	24.4	41.5	13.4	10.7
	42.1	8.1	7.9	8.1
	16.6	12.3	25.1	11.2
	28.6	16.3	10.9	10.1
	23.3	12.2	11.2	3.2
	35.4	23.3	8	3.6
	30.3	14.5	23.5	16.7
	46.6	12.9	12.7	12.9
	39.8	6.1	7.3	25
	37.7	5.1	32.2	58.9
	38.5	7.4	13.1	35
	30.4	4	7.3	25
	55.6	16.9	42.9	22.2
	21.7	26.3	16.2	7.9
	35.8	21.4	15.2	7.1
	28.6	60	12.1	5.1
	49	14.9	6.4	9.6
	26.4	38	4	4.5
	37	2.8	13.7	28.6
	52.9	11.5	12.6	23.4
	48.3	4.5	3	4
	58.6	27.2		29.4
	20.7	14.2		17.9
	39.3	25.1		3.6
	62	16.4		25.8
	30.1	7.1		12.3
	33.3	4.5		20.1
	18.6	37.1		33
	5.1	34.7		19.6
	31	9		11.1
	45.6	5.4		6.1
	21.7	4.3		4
	22.8	5		5.4
	43.6	5		4
	11.1	7		5.4
	14.7	7.2		7.9
	12.1			14.1
	11.8			15.8
	10.1			15
	35.4			15.2
	35.1			6.8
	9.3			10.3
	5.7
	3.6
	35.8
	10.4
	12.2
	14.4
	60.1
	20.2
	25.6

## Sheet: Figure2-Source Data 1E
Treatment	Vehicle	Rapamycin	BDNF
Process length	73.5	49.4	44.9
	78.9	60.4	47.7
	97.8	69.2	149.2
	45.9	51.6	81
	90.5	36.5	53.9
	120	55.3	63.6
	170	45.6	51.3
	62.9	39.3	19.3
	127	73	21.4
	209	38.5	13.4
	131	55	26.9
	119	83.4	45.4
	108		36.5
	144		28.6
	134		27.6
	83.9		51.8
	77.1		38.2
	70.1		18
	199
