# Supplementary material for: mTOR signaling regulates the morphology and migration of outer radial glia in developing human cortex
Source: eLife. 2020 Sep 2;9:e58737. doi: 10.7554/eLife.58737 (PMC7467727; doi:10.7554/eLife.58737)
Supplement: Figure 3—figure supplement 1—source data 1. [file elife-58737-fig3-figsupp1-data1.xlsx]

## Sheet: figure 3 - s1- source data1C
	HOPX+GFP+ process length				pS6+/totalGFP
	cag-gfp	raptor	tsc2		control	Raptor	TSC2 shRNA
	GFP	Raptor	Tsc2		30.8511	11.1111	50
	266	200	114		45.7286	15.3846	72.9508
	96	104	140
	355	95.9	78.7
	435	104	62.9
	106	240	80.5
	421	262	133
	311	78	98.11
	535	65.4	40.68
	181	200	86
	284	218	130.6
	333	103.88	52.68
	294	102.094	87.41
	109.91	38.16
	177.25	24.2
		37.83
	251.82	94.72
	167.2	93.32
	141.2
	174.95	12.65
		9.31
		60.6

## Sheet: figure 3 - s1- source data1D
	HOPX+GFP+ process length					pS6+/totalGFP
	cag-gfp	raptor	tsc2			cag-gfp	raptor	tsc2
	27.6	36.1	8.71			0	0.142857	0.545455
	18.6	8.52	30.2			0.333333	0	0.5625
		14.1	11.4			0	0.2	0.571429
	24.6	47.1	7			1	0.166667	0.692308
	39	49.6	7.7			0.333333	0.25	0.421053
	114	5.05	31.4			0.333333	0	0.666667
	8.4	10.7	1			0.4	0.2	0.571429
	7.55	9.6	10.3			0.315789	0	0.285714
	24.8	4.43	7.62			0.3	0.0277778	0.0526316
		7	0			0.142857	0	0.25
		3.7	5			0	0	0.285714
	27.5	2.7	16			0	0	0.0833333
			4.4			0.363636	0.166667	0.272727
							0.111111
	70		14.9			0.435897	0.30303	0.238095
	20.4	8.1	7.85			0.130435	0	0.176471
	5.6	1.8	13.7			0.807692	0.0333333	0.277778
		22.5	3.5			0.288889	0.08	0.3125
	22.1		20.6				0.0909091
	75.4		12.9			0.125	0.129032	0.214286
						0.357143	0.307692	0.235294
		3.5	18.1			0.214286	0.0909091	0.111111
		15.4				0.166667		0.181818
		3.7						0.304348
	16.3	3.3						0.130435
	32.2	1.7
	8.7
	30
	6.3
	24.7	15.2
	24.1	18.3
	15.1	8.2
	4.93
	26.7
	12
	62.3
	42.1
	19.9
	17
	28.5
	9.1	19.9
	14.8	20.5
	30.8	26.6
	26.4	19.7
	14.1	6.29
	12.6	14.1
	14.3	14.3
	18.3	16.5
	44.3	28
	30.9	2.28
	40.7	3.11
	27.2	11.9
	16	7.93
	17.1	4.52
	8.05	5.83
	9.6	6.14
	13
	17.3
	11.7
