# Supplementary material for: mTOR signaling regulates the morphology and migration of outer radial glia in developing human cortex
Source: eLife. 2020 Sep 2;9:e58737. doi: 10.7554/eLife.58737 (PMC7467727; doi:10.7554/eLife.58737)
Supplement: Figure 3—source data 1. [file elife-58737-fig3-data1.xlsx]

## Sheet: Figure3 - Source Data 1B
Migration distance/slice height	GFP	Raptor shR	Tsc2 shR
	26.8638	0.901857	5.70652
	26.6295	4.14463	8.65036
	13.6752	5.66649	27.3978
	14.9915	7.73196	24.9367
	12.4947	8.1137	5.3203
	53.0059	17.1357	12.7398
	26.5866	9.59799	26.8911
	0.0426986	10.9045	10.1022
	1.1925	1.86143	1.89179
	17.3003	21.1161	22.361
	22.8962	14.731	3.21604
	26.8209	11.3122	3.63224
	25.4266	7.65743	11.9183
	33.5047	8.18713	1.13507
	5.02555	1.94932	1.13293
	20.5403	11.6472	1.17069
	5.807	11.4035	14.426
	11.4286	5.96805	3.19864
	25.8723	0.93985	6.11782
	30.383	18.7889	16.5619
	45.4158	17.3666	14.1499
	29.5983	19.8327	16.8619
	22.4101	33.7391	7.33874
	22.4947	41.8677	17.8687
	45.6051	19.8327	14.0594
	34.3949	13.1214	9.06066
	17.4098	13.4301	9.21496
	39.0658	22.0583
	32.9338	26.2458
	32.9338	26.4225
	31.8015	9.10268
	30.7082	9.3767
	45.725	7.44271
	41.0278
	39.7504
	25.8075
	28.6525

## Sheet: Figure3 - Source Data 1D
distance	Vehicle	Rapamycin
	74.1	28.5
	42.7	53.1
	41	14.5
	72.2	33.1
	35.2	16.7
	36.6	37.6
	62.5	34
	41	35.5
	45.5
	64.5

## Sheet: Figure3 - Source Data 1E
distance	Vehicle	Rapamycin
	56.2	16.3
	17.5	60.1
	81.8	11.3
	22.1	10.4
	24.6	18.6
	67.6	0
	36.5	0
	48	39.2
	65.9	13.8
		3
		33.4
		24.4
