# Supplementary material for: mTOR signaling regulates the morphology and migration of outer radial glia in developing human cortex
Source: eLife. 2020 Sep 2;9:e58737. doi: 10.7554/eLife.58737 (PMC7467727; doi:10.7554/eLife.58737)
Supplement: Figure 4—figure supplement 1—source data 1. [file elife-58737-fig4-figsupp1-data1.xlsx]

## Sheet: Figure 4–s1-source data1A
	Cdc42						Rac I							Rho A
	control	Rapamycin	BDNF	CN04	CN04+Rapamycin		control	Rapamycin	BDNF	control	CN04	CN04+Rapamycin		control	Rapamycin	BDNF	CN04	CN04+Rapamycin
Absorbance (490nm)	0.757	0.605	0.374	2.592	2.156		0.77	0.547	0.55	0.77	1.147	0.982		0.196	0.169	0.345	0.173	0.205
	0.668	0.578	0.234	2.515	2.194		0.782	0.483	0.416	0.782	1.136	1.017		0.209	0.232	0.279	0.212	0.198
	0.27	0.129	0.292	2.132	2.114		0.465	0.494	0.529	0.465	1.188	0.766		0.376	0.273		0.27	0.213
	0.363	0.189	0.24	2.09	2.066		0.434	0.495	0.574	0.434	1.186	0.911		0.341	0.277		0.335	0.246
	0.23	0.495	1.075	2.828	1.999									0.4	0.379
	0.194	0.462		2.819	2.06									0.434	0.363
	0.8645	0.6415
