# Supplementary material for: mTOR signaling regulates the morphology and migration of outer radial glia in developing human cortex
Source: eLife. 2020 Sep 2;9:e58737. doi: 10.7554/eLife.58737 (PMC7467727; doi:10.7554/eLife.58737)
Supplement: Figure 4—source data 1. [file elife-58737-fig4-data1.xlsx]

## Sheet: Figure4 - Source Data 1A
phalloidin mean intensity	Vehicle	Rapamycin	BDNF
	32.6557	17.638	12.7103
	33.5457	26.1363	13.687
	23.2397	17.9743	11.688
	20.086	18.908	9.58767
	24.8787	12.095	8.854
	47.3853	16.0167	9.89967
	18.3797	7.71	14.9647
		11.025	14.24
		10.8273	11.7373
		13.1903	14.8267
		23.7547
		6.53267
		11.328

## Sheet: Figure4 - Source Data 1B
fiber length/slice height	control	Rapamycin	Rapamycin+CN04
	0.19473	0.0976582	0.303704
	0.183376	0.0570503	0.433333
	0.167952	0.0585451	0.411111
	0.213385	0.119656	0.210296
	0.299781	0.0702388	0.237323
	0.225178	0.114103	0.280051
	0.116358	0.249041	0.235892
	0.127319	0.250785	0.133935
	0.0967538	0.146843	0.214071
	0.147629	0.0929814	0.190022
	0.19833	0.059788	0.214172
	0.170892	0.04979	0.147124
	0.344754	0.088314
	0.352463	0.0829616
	0.266809	0.110616
	0.346914	0.175088
	0.264623	0.218566
	0.21783	0.215433
		0.136898
		0.0403135
		0.074748
